# Supplementary material for: Persimmon-like (BiO)2CO3microstructures: hydrothermal preparation, photocatalytic properties and their conversion into Bi2S3
Source: Royal Society of Chemistry journal article supplement (doi:10.1039/c0ce00324g), 2010-12-20
Supplement: c0ce00324g.pdf [file c0ce00324g.pdf]

## Supporting Information

### **Persimmon-Like (BiO)<sub>2</sub>CO<sub>3</sub> Microstructures: Hydrothermal Preparation, Photocatalytic Properties and their Conversion into Bi<sub>2</sub>S<sub>3</sub>**

Xiao-Feng Cao,<sup>a</sup> Lei Zhang,<sup>a</sup> Xue-Tai Chen,<sup>a</sup> and Zi-Ling Xue<sup>b</sup>

<sup>a</sup> State Key Laboratory of Coordination Chemistry, Nanjing National Laboratory of Microstructures, School of Chemistry and Chemical Engineering, Nanjing University, Nanjing 210093, P. R. China.

E-mail: [xtchen@netra.nju.edu.cn](mailto:xtchen@netra.nju.edu.cn); Fax: +86-25-83314502.

<sup>b</sup> Department of Chemistry, The University of Tennessee, Knoxville, Tennessee 37996-1600, USA.

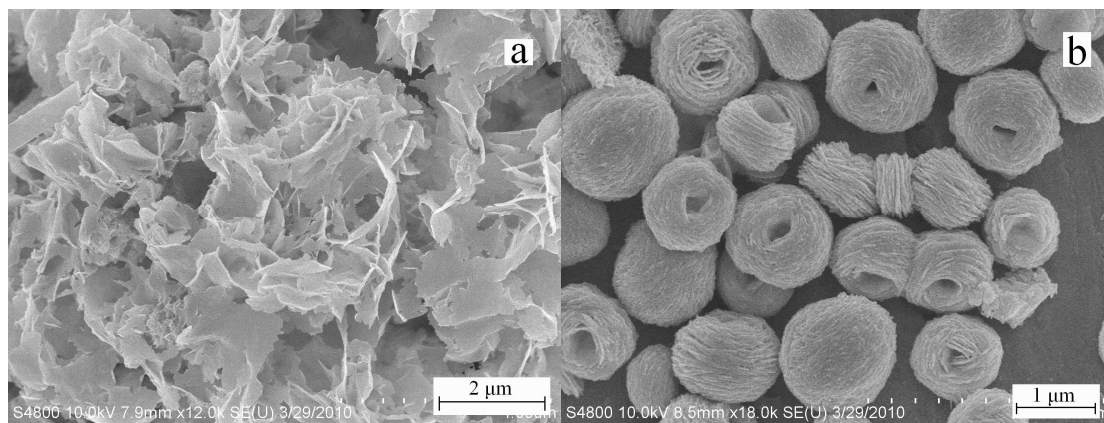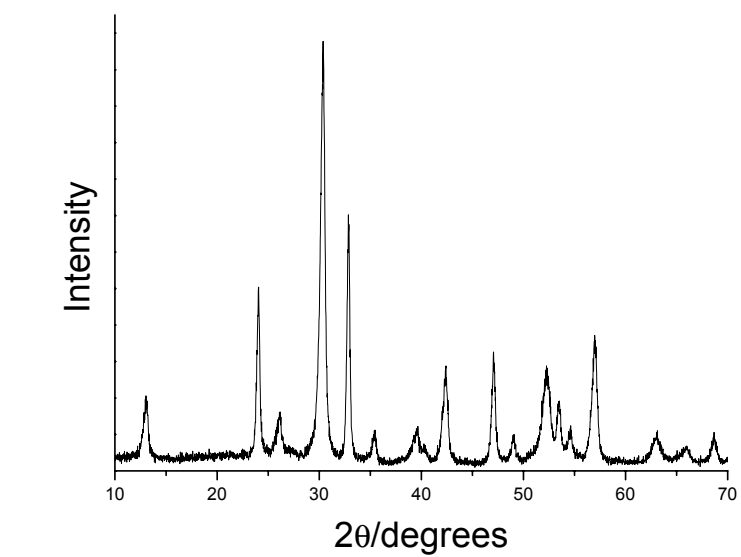

Fig. S1 FE-SEM images of  $(\text{BiO})_2\text{CO}_3$  obtained with different amount of  $\text{Na}_3\text{Cit}$ . (a) in the absence of  $\text{Na}_3\text{Cit}$ ; (b) with 1.5 mmol  $\text{Na}_3\text{Cit}$ . The XRD pattern of the product obtained in the absence of  $\text{Na}_3\text{Cit}$  (c).

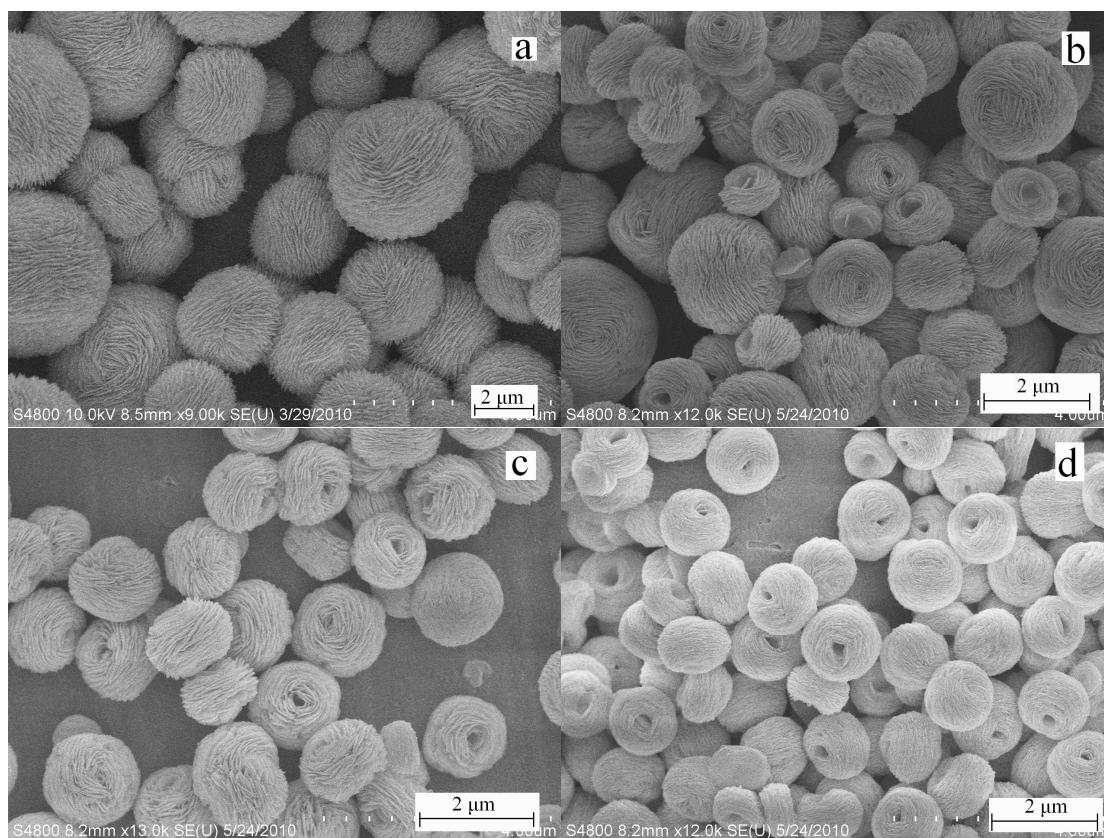

Fig. S2 FE-SEM images of  $(\text{BiO})_2\text{CO}_3$  obtained with different amount of PAM. (a) in the absence of PAM; (b) with 0.25 g PAM; (c) with 0.75 g PAM; and (d) with 1 g PAM.

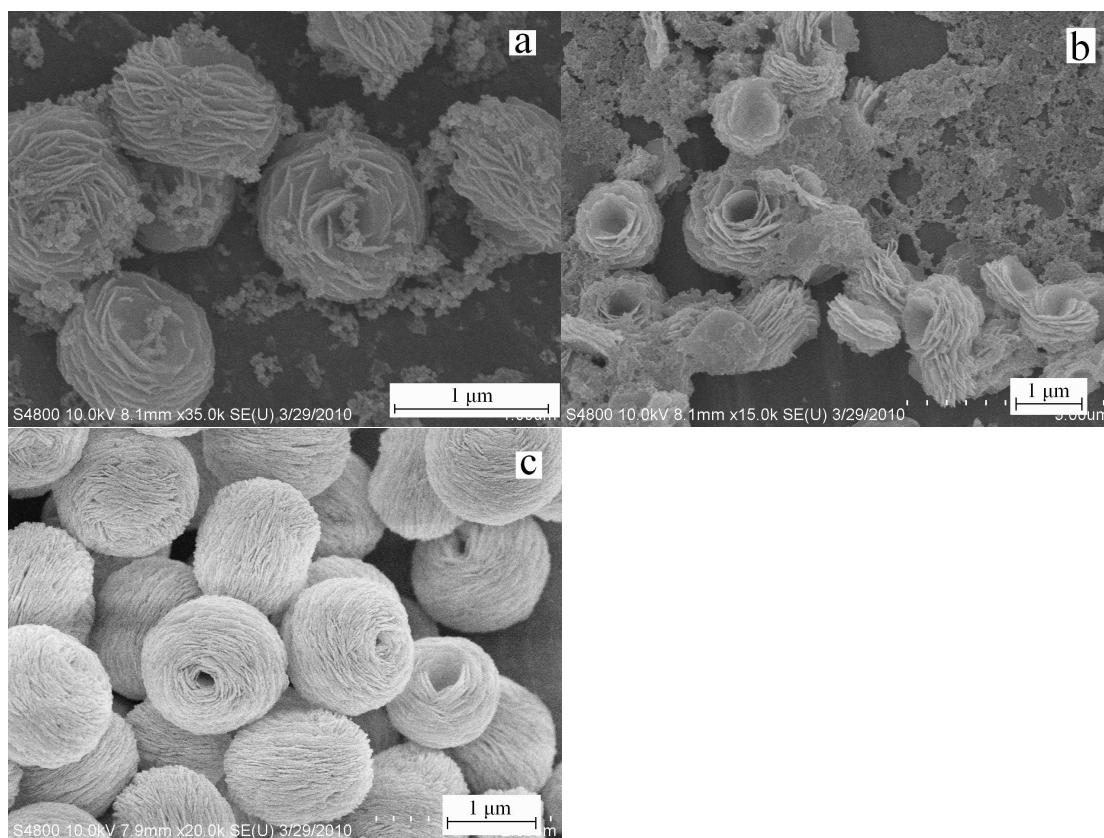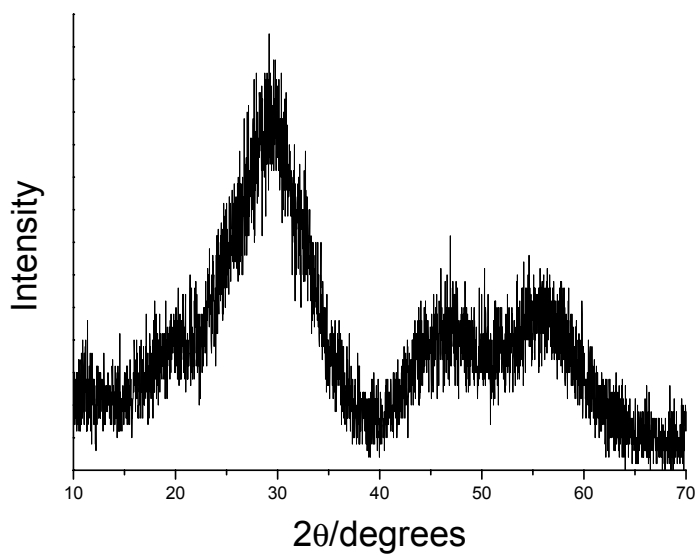

Fig. S3 FE-SEM images of  $(\text{BiO})_2\text{CO}_3$  obtained with different amount of urea. (a) in the absence of urea; (b) with 1.5 mmol urea; and (c) with 4.5 mmol urea. The XRD pattern of the product obtained in the absence of urea (e).



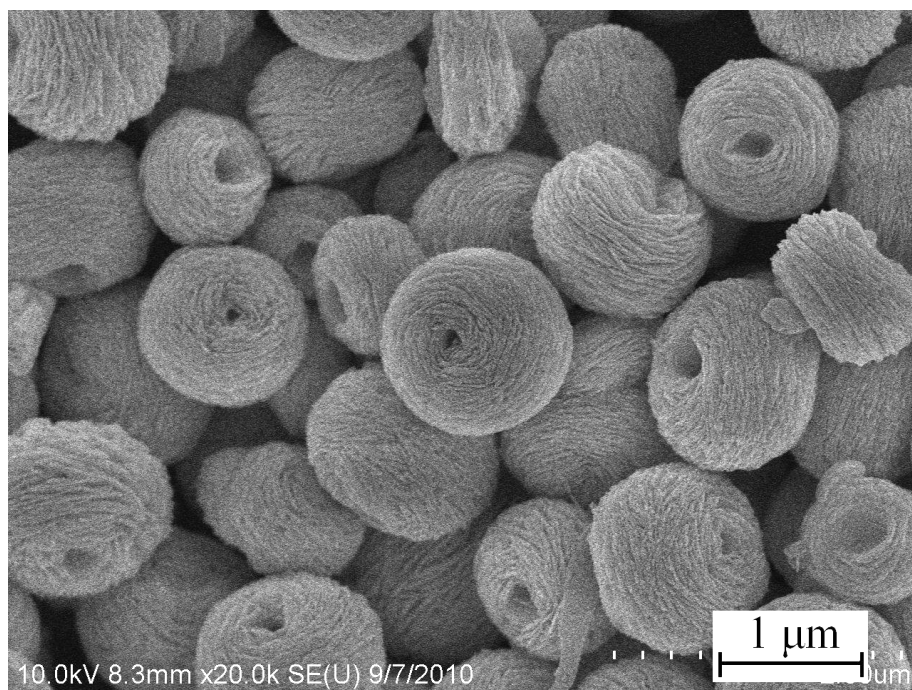

Fig. S4 FE-SEM image of persimmon-like  $(\text{BiO})_2\text{CO}_3$  at the end of the repeated photocatalysis experiment.
